# Supplementary material for: Identification and validation of HELLS (Helicase, Lymphoid-Specific) and ICAM1 (Intercellular adhesion molecule 1) as potential diagnostic biomarkers of lung cancer
Source: PeerJ. 2020 Mar 9;8:e8731. doi: 10.7717/peerj.8731 (PMC7067188; doi:10.7717/peerj.8731)
Supplement: Supplemental Information 2 [file peerj-08-8731-s002.xlsx]

## Sheet: Sheet1
	HELLS	GAPDH	△T
N1	18.06	15.54	2.52
N2	17.19	14.58	2.61
N3	18.8	15.9	2.9
N4	18.72	15.71	3.01
N5	18.89	15.88	3.01
N6	18.9	15.77	3.13
N7	19.8	16.61	3.19
N8	18.64	15.44	3.2
N9	18.99	15.79	3.2
N10	19.86	16.63	3.23
N11	18.98	15.7	3.28
N12	18.9	15.65	3.25
N13	17.94	14.7	3.24
N14	18.07	14.79	3.28
N15	19.1	15.89	3.21
N16	18.29	15.09	3.2
N17	18.23	15.03	3.2
N18	24	20.84	3.16
N19	19.86	16.74	3.12
N20	19.88	16.6	3.28
N21	19.75	16.45	3.3
N22	20.24	16.92	3.32
N23	20.29	16.96	3.33
N24	20.26	16.94	3.32
N25	22.72	19.38	3.34
N26	21.66	18.28	3.38
N27	19.77	16.38	3.39
N28	18.7	15.28	3.42
N29	20.13	16.7	3.43
N30	19.86	16.46	3.4
N31	20.02	16.64	3.38
N32	19.94	16.56	3.38
N33	20.86	17.49	3.37
N34	19.55	16.21	3.34
N35	19.95	16.62	3.33
N36	20.88	17.58	3.3
N37	19.85	16.57	3.28
N38	20	16.54	3.46
N39	19.05	15.53	3.52
N40	22.19	18.67	3.52
N41	22.13	18.58	3.55
N42	18.42	14.85	3.57
N43	23.97	20.31	3.66
N44	23.82	20.24	3.58
N45	23.66	20.09	3.57
N46	21.42	17.89	3.53
N47	20.77	17.09	3.68
N48	20.51	17.03	3.48
N49	26.76	22.84	3.92
N50	22.67	18.74	3.93
N51	22.57	18.6	3.97
N52	22.3	18.45	3.85
N53	22.82	18.92	3.9
N54	22.83	18.96	3.87
N55	22.64	18.94	3.7
N56	16.19	12.53	3.66
N57	19.59	15.67	3.92
N58	19.51	15.58	3.93
N59	25.78	21.85	3.93
N60	21.28	17.31	3.97
N61	21.35	17.24	4.11
N62	21.22	17.09	4.13
N63	19.88	15.65	4.23
N64	18.89	14.66	4.23
N65	18.5	14.37	4.13
N66	18.71	14.58	4.13
N67	18.48	14.39	4.09
N68	19.18	15.1	4.08
N69	24.12	19.37	4.75
N70	20.58	15.33	5.25
N71	20.76	14.68	6.08
N72	24.64	18.69	5.95
N73	19.91	14.7	5.21
N74	19.46	14.21	5.25
N75	18.92	14.79	4.13
N76	18.05	14.82	3.23
N77	18.92	15.44	3.48
N78	18.12	14.85	3.27
N79	16.33	13.09	3.24
T1	21.37	17.89	3.48
T2	20.61	17.09	3.52
T3	20.96	17.03	3.93
T4	19.6	15.67	3.93
T5	19.51	15.58	3.93
T6	25.65	21.85	3.8
T7	21.46	17.31	4.15
T8	21.43	17.24	4.19
T9	21.34	17.09	4.25
T10	19.78	15.65	4.13
T11	18.64	14.66	3.98
T12	18.78	14.37	4.41
T13	23.04	18.58	4.46
T14	18.33	13.85	4.48
T15	25.04	20.31	4.73
T16	25.02	20.24	4.78
T17	20.34	15.53	4.81
T18	23.77	18.67	5.1
T19	20.49	15.1	5.39
T20	19.87	14.7	5.17
T21	20.54	15.33	5.21
T22	19.97	14.68	5.29
T23	23.98	18.69	5.29
T24	20.27	14.98	5.29
T25	20.05	14.76	5.29
T26	20.28	14.69	5.59
T27	20.33	14.74	5.59
T28	19.51	14.7	4.81
T29	19.67	14.86	4.81
T30	20.62	15.8	4.82
T31	19.72	14.91	4.81
T32	19.54	14.76	4.78
T33	20.44	15.65	4.79
T34	19.52	14.77	4.75
T35	19.38	14.66	4.72
T36	19.45	14.79	4.66
T37	19.55	14.79	4.76
T38	19.71	14.93	4.78
T39	19.28	14.8	4.48
T40	18.98	14.52	4.46
T41	22.23	17.18	5.05
T42	21.12	16.07	5.05
T43	21.76	16.78	4.98
T44	21.28	16.11	5.17
T45	21.82	16.61	5.21
T46	20.86	15.47	5.39
T47	24.99	19.4	5.59
T48	22.66	17.12	5.54
T49	18.69	13.1	5.59
T50	22.58	17.2	5.38
T51	20.9	15.51	5.39
T52	22.82	17.53	5.29
T53	22.88	17.63	5.25
T54	21.04	15.79	5.25
T55	22.98	17.73	5.25
T56	19.24	14.03	5.21
T57	20.03	14.82	5.21
T58	20.65	15.44	5.21
T59	20.06	14.85	5.21
T60	19.26	14.09	5.17
T61	23.02	17.89	5.13
T62	22.18	17.09	5.09
T63	22.24	17.03	5.21
T64	21.31	15.67	5.64
T65	19.42	14.63	4.79
T66	21.58	16.6	4.98
T67	22.53	17.31	5.22
T68	22.41	17.24	5.17
T69	19.77	14.56	5.21
T70	19.92	14.63	5.29
T71	20.19	14.94	5.25
T72	19.81	14.6	5.21
T73	19.92	14.63	5.29
T74	19.98	14.85	5.13
T75	19.84	14.63	5.21
T76	19.67	14.76	4.91
T77	20.53	15.65	4.88
T78	18.93	14.77	4.16
T79	19.41	14.66	4.75
